# Supplementary material for: Performance Evaluation of Antlion Optimizer Based Regulator in Automatic Generation Control of Interconnected Power System
Source: Hindawi journal article supplement (doi:10.1155/2016/4570617), 2016-01-01
Supplement: f1 [file 4570617.f1.docx]

Table 1 Optimized parameters of AGC regulator

| **Parameters** | **ALO** | **GSA [18]** | **PSO [19]** | **GA [20]** |
| --- | --- | --- | --- | --- |
| **KP1** | 0.7280 | 0.8673 | 0.8444 | 0.9897 |
| **KI1** | 0.3576 | 0.4539 | 0.4412 | 0.5540 |
| **KD1** | 0.5103 | 0.4009 | 0.5253 | 0.6708 |
| **R1** | 0.0517 | 0.0472 | 0.0421 | 0.0450 |
| **D1** | 0.4718 | 0.4638 | 0.4151 | 0.5916 |
| **KP2** | 0.8197 | 0.9173 | 0.8251 | 0.8206 |
| **KI2** | 0.3321 | 0.3534 | 0.3094 | 0.4260 |
| **KD2** | 0.5540 | 0.5734 | 0.5623 | 0.9229 |
| **R2** | 0.0641 | 0.0532 | 0.0521 | 0.0635 |
| **D2** | 0.6682 | 0.8075 | 0.6256 | 0.9239 |

Table 1 shows the optimised parameters of Proportional Integral Derivative regulator with primary governor loop constants namely frequency sensitivity coefficient ‘D’ and speed regulation ‘R’ of proposed algorithm ALO with GSA, PSO and GA. It is observed that ALO outperforms over all three optimization methods with lowest value of regulator’s gain and highest value of speed regulation.

With PID controller, ALO shows more promising results as compared to GSA, PSO and GA in terms of settling time, damping ratio and peak overshoot.

To exhibit the comparative performance of the ALO regulator with other regulators, four different loading scenarios is simulated. These loading conditions are summarized below.

**Case A**: Load change in area 1 by 10%. The dynamic responses of ∆, ∆ and ∆ are given in Fig. 1-3 for all the algorithms.

**Case B**: Load change in area 2 by 20%. Fig. 4-6 shows the dynamic responses of the system.

**Case C**: Load is increased in area 1 by 25%. In Fig. 7-9 the system dynamic responses are shown.

**Case D**: Load is decreased in area 1 by 25% and its responses are given in Fig. 10-12.

**Case A:**

Fig. 1 Change in frequency of area 1 by 10% load increase in area 1

Fig. 2 Change in frequency of area 2 by 10% load increase in area 1

Fig. 3 Change in tie-line power by 10% load increase in area 1

**Case B:**

Fig. 4 Change in frequency of area 1 by 20% load increase in area 2

Fig. 5 Change in frequency of area 2 by 20% load increase in area 2

Fig. 6 Change in tie-line power by 20% load increase in area 2

**Case C:**

Fig. 7 Change in frequency of area 1 by 25% load increase in area 1

Fig. 8 Change in frequency of area 2 by 25% load increase in area 1

Fig. 9 Change in tie-line power by 25% load increase in area 1

**Case D:**

Fig. 10 Change in frequency of area 1 by 25% load decreases in area 1

Fig. 11 Change in frequency of area 1 by 25% load decreases in area 1

Fig. 12 Change in tie-line power by 25% load decreases in area 1
